# Supplementary material for: In Vitro Lipid Overload Affects Cellular Proliferation, Apoptosis, and Senescence in a Time-Dependent Manner in HepG2 Hepatocytes and LX-2 Hepatic Stellate Cells
Source: MDPI journal article supplement (doi:10.3390/cells13030282), 2024-02-04
Supplement: s1 [file s1]

## Supplementary Materials and Methods

### Activation of LX-2 cells:

Alpha-Smooth muscle actine ( $\alpha$ -SMA) was assessed by flow cytometry. An anti-  $\alpha$ -SMA antibody coupled with phycoeritrine (PE, R&D systems, USA) was used. LX-2 cells were collected from C, T, MS, MS-T, SS, and SS-T conditions, washed with PBS, and fixed for 10 minutes with paraformaldehyde 1% in cold PBS. After washing with PBS, cells were treated with 0.2% triton X-100 for 30 minutes at 4 °C. Cells were blocked with 1% bovine serum albumin in PBS for 15 minutes at room temperature. Ten  $\mu$ l of anti  $\alpha$ -SMA-PE were added for every million cells, and incubated for 30 minutes protected from light. Cells were centrifuged and resuspended in staining buffer. The samples were read with a FACS Canto II (BD, USA) and analyzed using FACSDiva software. A total of  $20 \times 10^3$  events were acquired in triplicate from  $7.5 \times 10^5$  cells.

### Supplementary Results

Increased activation of LX-2 cells was observed in T as an increased expression of  $\alpha$ -SMA, this was also observed in SS-T compared with SS. However, MS-T did not show changes in  $\alpha$ -SMA.

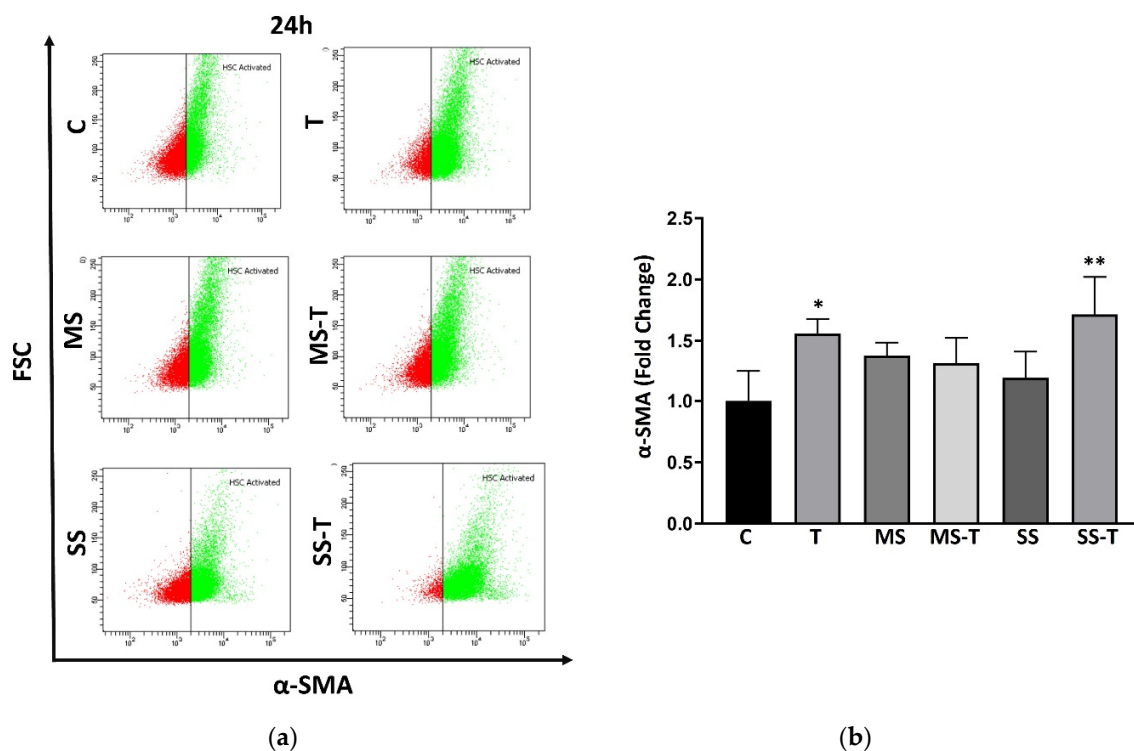

**Figure S1.** Activation of LX-2 cells. LX-2 cells were cultured in control (C), mild steatosis (MS), or severe steatosis (SS) conditions. The addition of TGF- $\beta$  rendered 3 further groups: T, MS-T, and SS-T. Activation was assayed via flow cytometry as the fold of increase in expression of  $\alpha$ -smooth muscle actin ( $\alpha$ -SMA). (a) Dot plots of LX-2 cells for different conditions and incubation times. (b)  $\alpha$ -SMA expression (fold change). Data are shown as means  $\pm$  SD and were analyzed using one-way ANOVA followed by Tukey's post hoc test. \* $p < 0.05$  vs. C; \*\* $p < 0.05$  vs. SS.  $n = 3$  wells for each condition.
